# Supplementary material for: Physicochemical Properties and Anticoagulant Activity of Purified Heteropolysaccharides from Laminaria japonica
Source: MDPI journal article supplement (doi:10.3390/molecules27093027), 2022-05-08
Supplement: s1 [file s1]

# Supporting Information

## Physicochemical properties and anticoagulant activity of purified heteropolysaccharides from *Laminaria japonica*

Tingting Li <sup>1,†</sup>, Haiqiong Ma <sup>1,†</sup>, Hong Li <sup>1</sup>, Hao Tang <sup>1</sup>, Jinwen Huang <sup>1</sup>, Shiyong Wei <sup>1</sup>, Qingxia Yuan <sup>1</sup>, Xiaohuo Shi <sup>2</sup>, Chenghai Gao <sup>1</sup>, Shunli Mi <sup>1</sup>, Longyan Zhao <sup>1,\*</sup>, Shengping Zhong <sup>1,\*</sup> and Yonghong Liu <sup>1,\*</sup>

- <sup>1</sup> Institute of Marine Drugs, Guangxi University of Chinese Medicine, Nanning 530200, China; li15578909861@126.com (T.L.); MHQ18878839254@163.com (H.M.); hongli12212022@163.com (H.L.); yaoxuetanghao@outlook.com (H.T.); huangjinwen1127@163.com (J.H.); wsy980915@163.com (S.W.); qingxiayuan@163.com (Q.Y.); gaochh@gxcmu.edu.cn (C.G.); mishunli@126.com (S.M.)
- <sup>2</sup> Key Laboratory of Precise Synthesis of Functional Molecules of Zhejiang Province, School of Science, Westlake University, Hangzhou 310024, China; shixiaohuo@westlake.edu.cn (X.S.)
- \* Correspondence: longyanzhao@gmail.com (L.Z.); shpzhong@foxmail.com (S.Z.); yonghongliu@scsio.ac.cn (Y.L.)
- † These authors contributed equally to this work.

**Citation:** Li, T.; Ma, H.; Li, H.; Tang, H.; Huang, J.; Wei, S.; Yuan, Q.; Shi, X.; Gao, C.; Mi, S.; et al. Physicochemical Properties and Anticoagulant Activity of Purified Heteropolysaccharides from *Laminaria japonica*. *Molecules* 2022, 27, 3027 <https://doi.org/10.3390/molecules27093027>

Academic Editors: Lesław Juszczak and Janusz Kapusniak

Received: 31 March 2022

Accepted: 5 May 2022

Published: 8 May 2022

**Publisher's Note:** MDPI stays neutral with regard to jurisdictional claims in published maps and institutional affiliations.

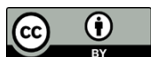

**Copyright:** © 2022 by the authors. Submitted for possible open access publication under the terms and conditions of the Creative Commons Attribution (CC BY) license (<https://creativecommons.org/licenses/by/4.0/>).

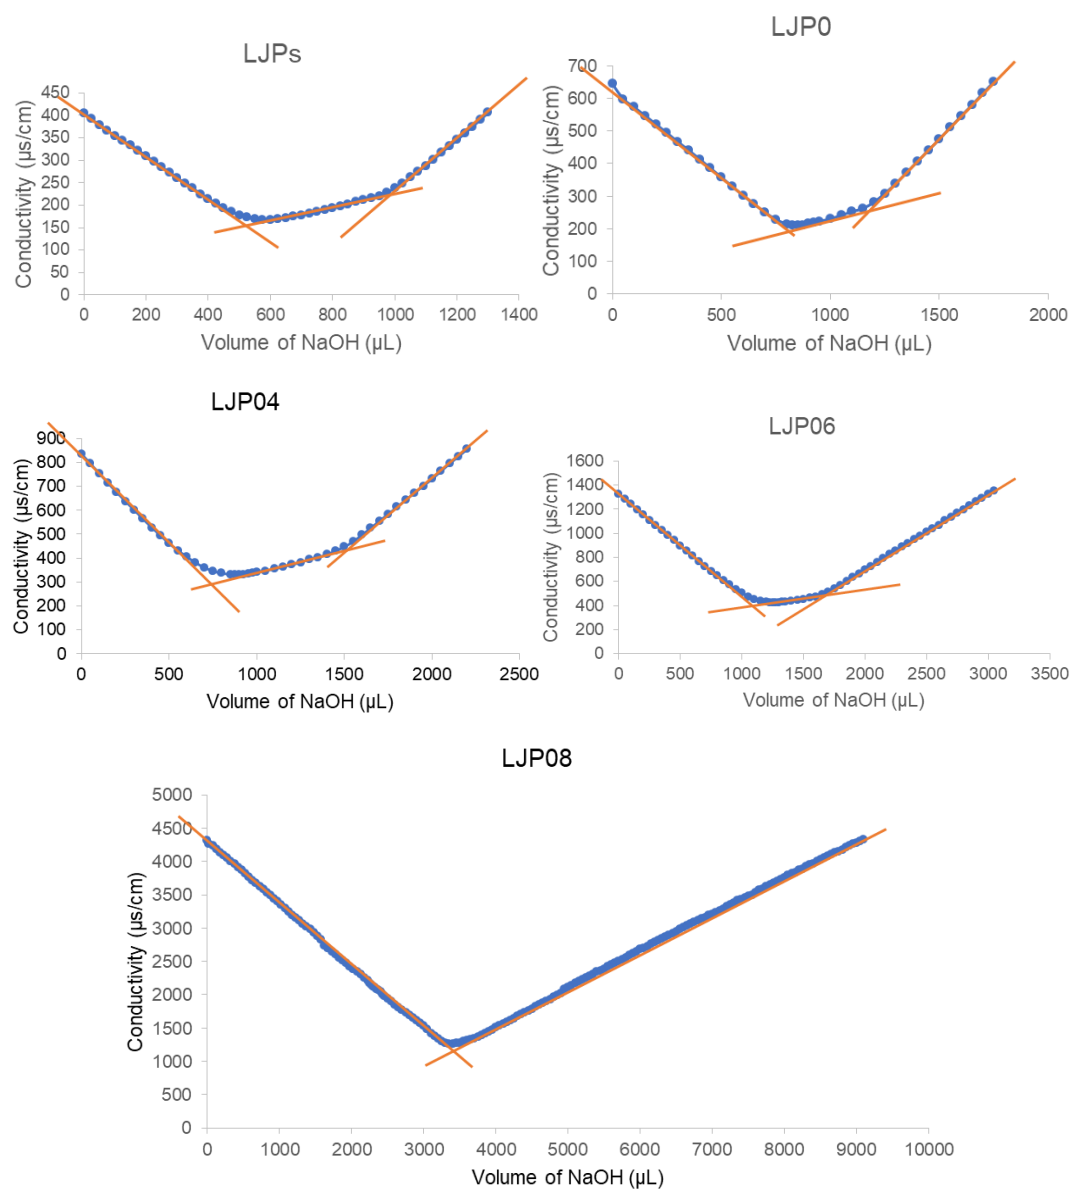

Figure S1. Conductimetric titration curves of LJP, LJP0, LJP04, LJP06, and LJP08

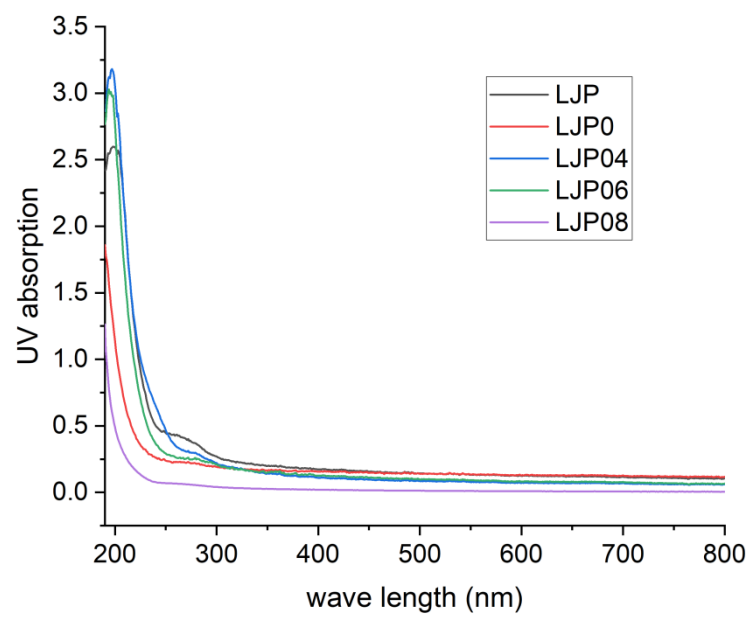

Figure S2. UV spectrum of LJPs and its purified fractions
